# Supplementary material for: Do Alu repeats drive the evolution of the primate transcriptome?
Source: Springer Nature journal article supplement (doi:10.1186/gb-2008-9-2-r25), 2008-02-01

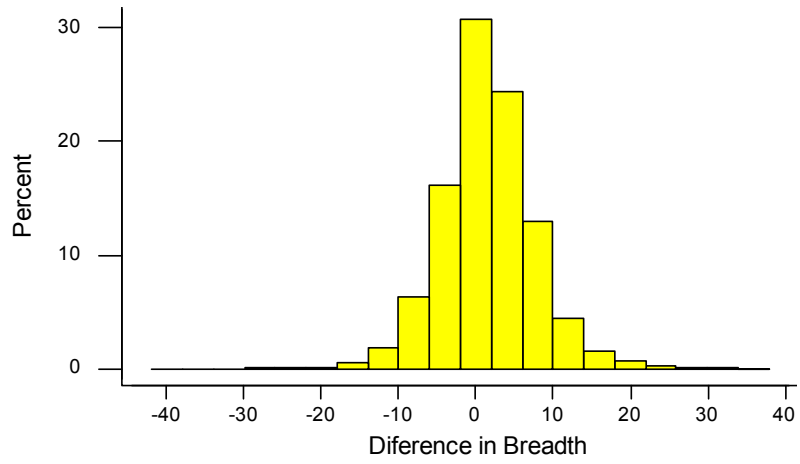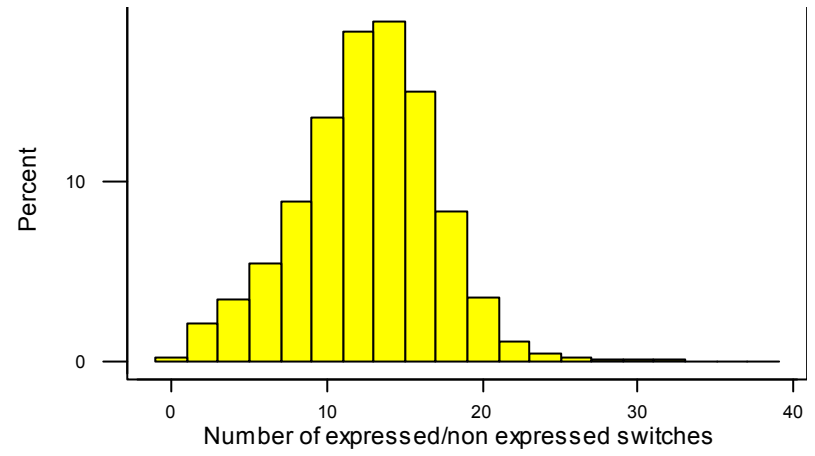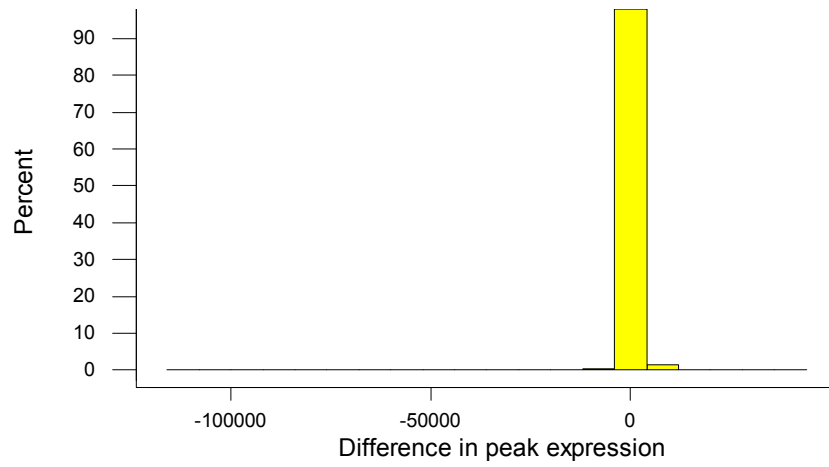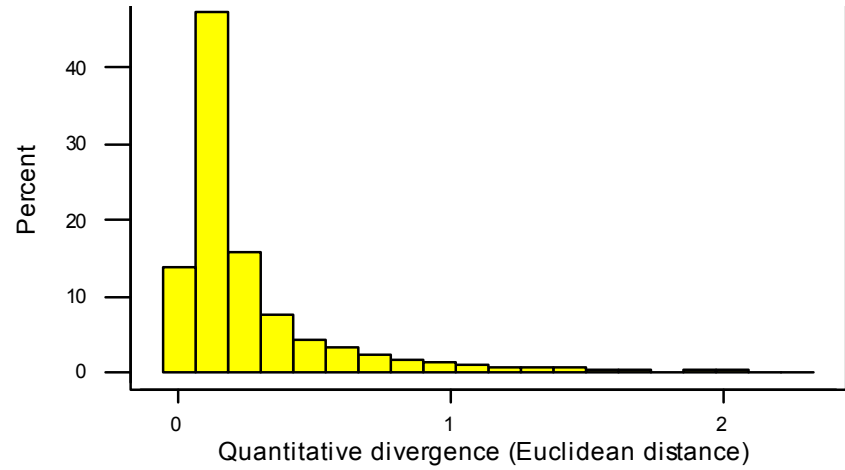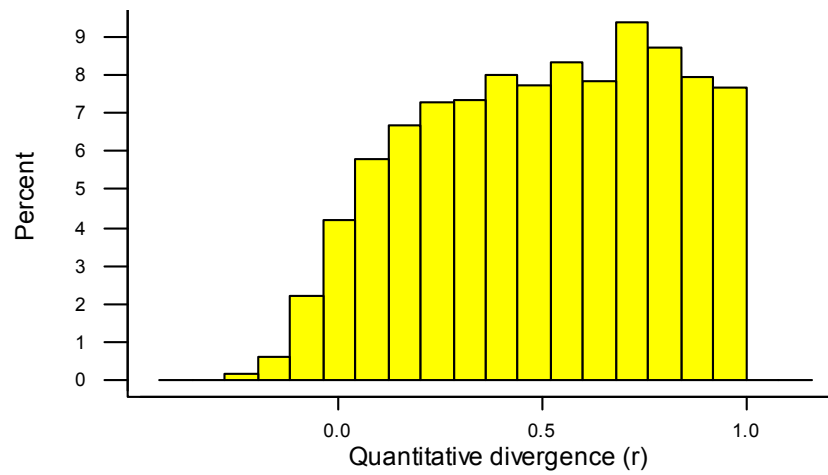

Supplement: Additional file 4 [file gb-2008-9-2-r25-s4.pdf]
